# Supplementary material
Source: publisher figshare collection journal article supplement (https://sage.figshare.com/ndownloader/files/21802911)
Supplement: Supplementary file 1 [file 21802911]

Appendix A

*Documents Analyzed (accessed 2016)*

| **State** |  | **Certification** | | | | |  | **Early Learning Standards** | | |
| --- | --- | --- | --- | --- | --- | --- | --- | --- | --- | --- |
|  | **Grade Band** | **Type of Document** | **Title** | **Date** | **Organizational Website** |  | **Title** | **Date** | **Organizational Website** |
| Alabama |  | PreK – Gr. 3 | *State Board of Ed Rules / Reg* | Rules of the Alabama State Board of Education: Educator Preparation (290-3-3-.05 Early Childhood Education (Grades P-3) | 2016 | Alabama State Department of Education – Alabama Administrative Code |  | Alabama Developmental Standards for Preschool Children | 2012 | Alabama State Department of Education |
| Alaska |  | PreK – Gr. 3 | Email | -- | 2015 | Teacher Certification Department |  | Early Learning Guidelines | 2007 | Alaska Department of Education and Early Development |
| Arizona |  | Birth – Age 8 / Gr. 3 | *Certif Info / App* | Requirements for the Early Childhood Education Certificate: Arizona Department of Education – Certification Unit | 2015 | Arizona Department of Education – Educator Certification |  | Arizona Early Learning Standards | 2013 | Arizona Department of Education |
| Arkansas |  | Birth – K | *State Board of Ed Rules / Reg* | Arkansas Department of Education Policies Governing Programs for Educator Licensure Offered by Institutions of Higher Education in Arkansas | 2014 | Arkansas Department of Education |  | Arkansas Child Development and Early Learning Standards: Birth Through 60 Months | 2016 | Arkansas Head Start |
| California |  | PreK & self-contained K-12 | *Certif Info / App* | Multiple Subject Teaching Credential: Requirements for Teachers Prepared in California | 2016 | California Commission on Teacher Credentialing |  | California Preschool Learning Foundations | 2008 | California Department of Education- Child Development Division |
| Colorado |  | Birth – Age 8 / Gr. 3 | *Certif Info / App* | Early Childhood Education (Ages 0-8) Added Endorsement Content Evaluation Worksheet | 2016 | Colorado Department of Education – Educator Licensing |  | Preschool Math Academic Standards In High Quality Early Childhood Care and Education Settings  Preschool Reading, Writing, and Communicating Academic Standards In High Quality Early Childhood Care and Education Settings | 2012 | Colorado Department of Education – Office of Early Learning and School Readiness |
| Connecticut |  | Birth – K  Nursery – Gr. 3 | *State Board of Ed Rules / Reg* | State of Connecticut Regulation of State Board of Education | 1998 | Connecticut State Department of Education |  | Connecticut Early Learning and Development Standards (CT ELDS) | 2014 | Connecticut Office of Early Childhood |
| Delaware |  | Birth – Gr. 2 | *State Board of Ed Rules / Reg* | Administrative Code: 1520 Early Childhood Teacher | 2013 | State of Delaware – Delaware Regulations |  | Delaware Early Learning Foundations | 2010 | Delaware Institute for Excellence in Early Childhood Education |
| Florida |  | Age 3 – Gr. 3 | *State Board of Ed Rules / Reg* | Administrative Rules: 6A-4.0142 Specialization Requirements for Certification in the Area of Prekindergarten / Primary Education (Age Three Through Grade Three) – Academic Class | 2000 | Florida Department of Education – Educator Certification |  | Florida Early Learning and Development Standards for Four-Year-Olds | 2011 | Florida Department of Education – Office of Early Learning |
|  | Birth – Age 4 | *State Board of Ed Rules / Reg* | Administrative Rules: 6A-4.0141 Specialization Requirements for Certification in the Area of Preschool Education (Birth Through Age Four) – Academic Class | 1994 | Florida Department of Education – Educator Certification |  |
|  | *Program / Certif Standards* | Florida Statutes Related to Early Learning | 2014 | Florida Department of Education – Office of Early Learning |  |
| Georgia |  | Birth – K / Age 5 | *State Board of Ed Rules / Reg* | Educator Preparation Rules: 505-3-.13 Birth through Kindergarten Program | 2014 | Georgia Professional Standards Commission |  | Georgia Early Learning and Development Standards | 2013 | Georgia Department of Early Care and Learning |
|  | PreK – Gr. 5 | *State Board of Ed Rules / Reg* | Educator Preparation Rules: 505-3-.14 Early Childhood Education Program | 2014 | Georgia Professional Standards Commission |  |
| Hawaii |  | PreK – Gr. 3  Pre-K – K | *Program / Certif Standards* | Hawaii Preparation Program Performance Standards – Council for Accreditation of Educator Preparation (CAEP) Standards | 2015 | Hawaii Teacher Standards Board |  | Hawaii Early Learning and Development Standards (HELDS) | 2014 | State of Hawaii Executive Office on Early Learning |
| Idaho |  | Birth – Gr. 3 | *State Board of Ed Rules / Reg* | Idaho Administrative Code: Education, Board of and Department of (08), Rules Governing Uniformity (08.02.02)...019.Early Childhood / Early Childhood Special Education Blended Certificate | 2004 | Idaho Department of Administration – Office of the Administrative Rules Coordinator |  | Early Learning eGuidelines | 2013 | Idaho Department of Health and Welfare |
| Illinois |  | Birth – Gr. 3 | *Program / Certif Standards* | Standards for Certification in Early Childhood Education [26.110-26.270] | 2002 | Illinois State Board of Education |  | Illinois Early Learning & Development Standards | 2013 | Illinois State Board of Education |
| Indiana |  | PreK – Gr. 3 | *Program / Certif Standards* | Indiana Content Standards for Educators: Early Childhood Generalist | 2010 | Indiana Department of Education – Licensing |  | Foundations to the Indiana Academic Standards for Young Children from Birth to Age 5 | 2012 | Indiana Department of Education |
| Iowa |  | PreK – K | *Certif Info / App* | Checklist for Adding an Endorsement to a License: Teacher Prekindergarten through Grade Three | n.d. | Iowa Board of Educational Examiners |  | Iowa Early Learning Standards | 2012 | Iowa Department of Education |
|  | *State Board of Ed Rules / Reg* | Iowa Administrative Code: 281.79.15 Teacher Candidate Knowledge, Skills and Dispositions Standard | 2015 | Iowa Legislature |  |
| Kansas |  | Birth – K | *Program / Certif Standards* | Kansas Licensure Program Standards for Early Childhood Unified B-K Educators | 2015 | Kansas State Department of Education |  | Kansas Early Learning Standards | 2013 | Kansas State Department of Education |
|  |  | Birth – Gr. 3 | *Program / Certif Standards* | Kansas Licensure Program Standards for Early Childhood Unified B-G3 Educators | 2015 | Kansas State Department of Education |  |
| Kentucky |  | Birth – K | *State Board of Ed Rules / Reg* | Kentucky Administrative Regulations – 16 KAR 2:040. Interdisciplinary early childhood education, birth to primary | n.d. | Kentucky General Assembly |  | Kentucky’s Early Childhood Standards | 2013 | Kentucky Governor’s Office of Early Childhood |
|  | *Program / Certif Standards* | Kentucky Teacher Standards for Preparation and Certification: IECE Birth to Primary | 2003 | Kentucky Education Professional Standards Board |  |
| Louisiana |  | Birth – K | *State Board of Ed Rules / Reg* | Louisiana Standards for State Certification of School Personnel (Title 28 – Education; Part CXXXI. Bulletin 746). §204. Minimum Requirements for Approved Regular Education Programs for Birth to Kindergarten | 2015 | Louisiana Division of Administration |  | Louisiana’s Birth to Five Early Learning & Development Standards (ELDS) | 2013 | Louisiana Department of Education |
|  | PreK – Gr. 3 | *State Board of Ed Rules / Reg* | Louisiana Standards for State Certification of School Personnel (Title 28 – Education; Part CXXXI. Bulletin 746). §205. Minimum Requirements for Approved Regular Education Programs for Grades PK-3 |  |
| Maine |  | Birth – Age 5 / K | *Certif Info / App* | Requirements for the Early Childhood Teacher Certificate Birth to Age 5 (081) | 2015 | Maine Department of Education – Certification & Credentialing |  | Maine’s Early Learning and Development Standards | 2015 | Maine Department of Education |
| Maryland |  | PreK – Gr. 3 | *State Board of Ed Rules / Reg* | Code of Maryland Regulations (COMAR): 13A.12.02.03 – .03 Certification in Early Childhood Education (Prekindergarten—Grade 3) | n.d. | Maryland Division of State Documents |  | Maryland Early Learning Standards Birth to 8 Years | 2015 | Maryland Department of Education – Division of Early Childhood |
| Massachusetts |  | PreK – Gr. 2 | *State Board of Ed Rules / Reg* | 603 CMR 7.00: Regulations for Educator Licensure and Preparation Program Approval | 2015 | Massachusetts Department of Elementary and Secondary Education |  | Prekindergarten Standards in English Language Arts and Literacy  Prekindergarten Standards in Mathematics | 2011 | Massachusetts Executive Office of Education |
| Michigan |  | PreK | *Program / Certif Standards* | Standards for the Preparation of Teachers of Early Childhood ZS (General and Special Education) | 2010 | Michigan Department of Education |  | Early Childhood Standards of Quality for Prekindergarten | 2013 | Michigan Department of Education |
| Minnesota |  | Birth – Gr. 3 | *State Board of Ed Rules / Reg* | Minnesota Administrative Rules 8710.3000 Teachers of Early Childhood Education | 2012 | Minnesota Legislature – Administrative Rules |  | Early Childhood Indicators of Progress: Minnesota’s Early Learning Standards | 2005 | Minnesota Department of Education |
|  |  | Age 3 – K | *State Board of Ed Rules / Reg* | Minnesota Administrative Rules 8710.3350 Preprimary Endorsement License | 2009 | Minnesota Legislature – Administrative Rules |  |
| Mississippi |  | PreK – K | *State Board of Ed Rules / Reg* | Mississippi Code of 1972 37-3-2. Certification of teachers and administrators | 2015 | Mississippi Department of Education |  | Early Learning Standards for Classrooms Serving Four-Year-Old Children | 2013 | Mississippi Department of Education |
| Missouri |  | Birth – Gr. 3 | *State Board of Ed Rules / Reg* | Missouri Rules of Department of Elementary and Secondary Education: 5 CSR 20-400.510 Certification Requirements for Teacher of Early Childhood Education (Birth – Grade 3) | 2014 | Missouri Secretary of State |  | Missouri Early Learning Goals: Birth to Kindergarten Entry | 2013 | Missouri Department of Elementary and Secondary Education |
| Montana |  | Birth – Age 8 / Gr. 3 | *State Board of Ed Rules / Reg* | Administrative Rules of Montana – Chapter 58 Professional Educator Preparation Program Standards (10.58.531 Early Childhood Education) | 2014 | Montana Office of Public Instruction |  | Montana Early Learning Standards | 2014 | Montana Office of Public Instruction |
| Nebraska |  | PreK – Gr. 3 | *State Board of Ed Rules / Reg* | Title 92, Nebraska Administrative Code, Chapter 24 – Rule 20: Regulations for the Approval of Teacher Education Programs  Rule 24: Regulations for Certification Endorsements | 2014 | Nebraska Department of Education – Legal |  | Nebraska Early Learning Guidelines for Ages 3-5 | 2013 | Nebraska Department of Education |
| Nevada |  | Birth – Gr. 2 | *Certif Info / App* | Nevada Early Childhood License Requirements | 2016 | Nevada Department of Education – Educator Licensure |  | Nevada Pre-Kindergarten Standards | 2010 | Nevada Department of Education |
| New Hampshire |  | Birth – Gr. 3 | *State Board of Ed Rules / Reg* | New Hampshire Administrative Rules – Chapter Ed 500 Certification Standards for Education Personnel (Ed 507.18 Early Childhood Education Teacher) | 2012 | New Hampshire General Court – State Laws and Rules |  | New Hampshire Early Learning Guidelines: Birth through Five | 2016 | New Hampshire Department of Education |
| New Jersey |  | PreK – Gr. 3 | *State Board of Ed Rules / Reg* | New Jersey Administrative Code and Statutes – N.J.A.C. 6A:9A, New Jersey Educator Preparation Programs  N.J.A.C. 6A:9, Professional Standards  N.J.A.C. 6A:9B, State Board of Examiners and Certification | n.d. | New Jersey Department of Education |  | Preschool Teaching and Learning Standards | 2014 | State of New Jersey Department of Education – Division of Early Childhood Education |
| New Mexico |  | Birth – PreK | *State Board of Ed Rules / Reg* | New Mexico Administrative Code – 6.61.11 | 2010 | New Mexico Public Education Department |  | New Mexico Early Learning Guidelines: Birth through Kindergarten | 2014 | Early Learning New Mexico |
|  |  | PreK – Gr. 3 | *State Board of Ed Rules / Reg* | New Mexico Administrative Code – 6.61.12 | 2010 | New Mexico Public Education Department |  |
| New York |  | Birth – Gr. 2 | *State Board of Ed Rules / Reg* | Official Compilation of Codes, Rules, and Regulations of the State of New York Title 8. Education Department Chapter II. Regulations of the Commissioner Subchapter A. Higher Education and Professional Education 52.21 Registration of curricula in teacher education | 2016 | Thompson Reuters Westlaw - New York Codes, Rules and Regulations |  | New York State Prekindergarten Common Core Learning Standards | 2011 | New York State Education Department |
| North Carolina |  | Birth – K | *Program / Certif Standards* | Standards for Birth-Kindergarten Teacher Candidates | 2009 | North Carolina Division of Child Development and Early Education |  | North Carolina Foundations for Early Learning and Development | 2013 | North Carolina Department of Health and Human Services – Division of Child Development and Early Education |
| North Dakota |  | Birth – Gr. 3 | *State Board of Ed Rules / Reg* | North Dakota Education Standards and Practices Board – Program Approval Standards (INTASC 2011) | 2012 | North Dakota Education Standards and Practices Board |  | North Dakota Pre-Kindergarten Content Standards | 2013 | North Dakota Department of Public Instruction |
| Ohio |  | PreK – Gr. 3 | *State Board of Ed Rules / Reg* | Ohio Administrative Code: Ohio Teacher Education and Licensure Standards | 2014 | Ohio Department of Education |  | Ohio’s Early Learning and Development Standards in All Essential Domains of School Readiness (Birth – Age 5) | 2012 | Ohio Department of Education |
|  |  | PreK (Ages 3-5) | *Program / Certif Standards* | Pre-Kindergarten Endorsement: 2008 Ohio/NAEYC/Ohio’s Early Learning Content Standards Ages 3-5 | 2010 | Ohio Department of Education |  |
| Oklahoma |  | PreK – Gr. 3 | *State Board of Ed Rules / Reg* | Oklahoma Administrative Code: 210:20-9-172. Full (subject matter) competencies for licensure and certification | 2001 | Oklahoma Secretary of State – Office of Administrative Rules |  | Oklahoma Early Learning Guidelines for Children Ages 3 Through 5 | 2010 | Oklahoma State Department of Education |
| Oregon |  | PreK – Gr. 4 | Email | -- | 2015 | Teacher Standards and Practices Commission |  | Head Start Early Learning Outcomes Framework: Ages Birth to Five | 2015 | Oregon Department of Education – Early Learning Division |
|  | *State Board of Ed Rules / Reg* | Oregon Revised Statutes: 342.121 Teacher and Administrator Licensing | 2015 | Oregon Legislature |  |
| Pennsylvania |  | PreK – Gr. 4 | *Program / Certif Standards* | The Framework for Grades PreK-4 Program Guidelines | 2009 | Pennsylvania Department of Education |  | Pennsylvania Learning Standards for Early Childhood: Pre-Kindergarten | 2014 | Office of Child Development and Early Learning |
| Rhode Island |  | PreK – Gr. 2 | *State Board of Ed Rules / Reg* | Regulations Governing the Certification of Educators in Rhode Island: 9.1.1 Early Childhood Education Teacher, Grades PK ‐ 2 | 2012 | Rhode Island Secretary of State - Rhode Island Code of Regulations |  | Rhode Island Early Learning and Development Standards | 2013 | Rhode Island Department of Education |
| South Carolina |  | PreK – Gr. 3 | *State Board of Ed Rules / Reg* | South Carolina Educator Licensure Manual | 2015 | South Carolina Department of Education |  | South Carolina Early Learning Standards for 3-, 4-, and 5-Year-Old Children | 2009 | South Carolina Department of Education |
| South Dakota |  | Birth – PreK | *State Board of Ed Rules / Reg* | South Dakota Rules (Requirements for Basic Teaching Programs): 24:53:07:01 Birth through Preschool Education Program | 2006 | South Dakota Legislature |  | South Dakota Early Learning Guidelines | 2008 | South Dakota Department of Social Services |
|  |  | PreK – Age 8 / Gr. 3 | *State Board of Ed Rules / Reg* | South Dakota Rules (Requirements for Basic Teaching Programs): 24:53:07:02 Birth through Age Eight Early Childhood Program |  |
| Tennessee |  | PreK – Gr. 3  PreK – K | *Program / Certif Standards* | Tennessee Licensure Standards and Induction Guidelines | 2004 | Tennessee Department of Education |  | Revised Tennessee Early Learning Developmental Standards for Four-Year-Olds | 2012 | Tennessee Department of Education |
| Texas |  | PreK (Ages 3 & 4) – Gr. 6 | *Program / Certif Standards* | Mathematics Generalist  EC-6 Standards  English Language Arts and Reading Generalist EC-6 Standards | n.d. | Texas Education Agency |  | Texas Prekindergarten Guidelines | 2015 | Texas Education Agency |
| Utah |  | N/A | -- | -- | -- | Utah State Board of Education |  | Utah’s Early Childhood Core Standards | 2013 | Utah State Office of Education |
| Vermont |  | Birth – PreK, K – Gr. 3, or Birth – Gr. 3 | *State Board of Ed Rules / Reg* | Rule 5440 – Licensing Endorsements: Supplement A | 2016 | Vermont Agency of Education |  | Vermont Early Learning Standards | 2015 | State of Vermont Agency of Education |
| Virginia |  | PreK (Ages 3 & 4)  PreK – Gr. 3  PreK – Gr. 6 | *State Board of Ed Rules / Reg* | Virginia State Board of Education: 8VAC20-22. Licensure Regulations for School Personnel | 2015 | Virginia Register of Regulations |  | Virginia’s Foundation Blocks for Early Learning Standards: Comprehensive Standards for Four-Year-Olds | 2013 | Virginia Department of Education |
| Washington |  | PreK – Gr. 4 | *Program / Certif Standards* | Early Childhood Education Endorsement Competencies – Grades P-3 | 2014 | State of Washington Professional Educator Standards Board |  | Washington State Early Learning and Development Guidelines: Birth through 3rd Grade | 2012 | State of Washington Office of the Superintendent of Public Instruction |
| West Virginia |  | PreK – K | *State Board of Ed Rules / Reg* | Title 126, Legislative Rule Board of Education, Series 114 – Approval of Educator Preparation Programs (5100)  Title 126, Legislative Rule Board of Education, Series 136 – Minimum Requirements for the Licensure of Professional/ Paraprofessional Personnel and Advanced Salary Classifications (5202) | 2016 | West Virginia Department of Education |  | West Virginia Early Learning Standards Framework | 2015 | West Virginia Department of Education |
| Wisconsin |  | Birth – Age 8 / Gr. 3 | *Certif Info / App* | Wisconsin Content Guidelines for Early Childhood (EC) Regular Education Licensure Programs Ages Birth – 8 | 2001 | Wisconsin Department of Public Instruction |  | Wisconsin Model Early Learning Standards: Birth to First Grade | 2013 | Wisconsin Department of Public Instruction |
|  | *State Board of Ed Rules / Reg* | Wisconsin Administrative Code: PI 34 – Educator Licenses | n.d. | Wisconsin State Legislature |  |
|  | Birth – Age 11 / Gr. 5 | *Certif Info / App* | Wisconsin Content Guidelines for Early Childhood-Middle Childhood (EC-MC) Regular Education Licensure Programs Ages Birth – Age 11 | 2001 | Wisconsin Department of Public Instruction |  |
|  | *State Board of Ed Rules / Reg* | Wisconsin Administrative Code: PI 34 – Educator Licenses | n.d. | Wisconsin State Legislature |  |
| Wyoming |  | Birth – Age 5  Birth – Age 8 / Gr. 3 | *State Board of Ed Rules / Reg* | Chapter 4: Program Approval Standards for Endorsement Areas | 2015 | Wyoming Professional Teaching Standards Board |  | Wyoming Early Learning Foundations: For Children Ages 3-5 | 2013 | Wyoming Department of Education |

Note: In the table, the columns titled “organizational website” name the organizations whose websites housed the documents we analyzed. The two dashes (--) mean “not applicable” or “none.” Finally, “K” refers to “kindergarten.”
